# Supplementary material for: Xerostomia care in palliative patients: a scoping review protocol
Source: Research Square preprint supplement (doi:10.21203/rs.3.rs-3395991/v1), 2023-10-13
Supplement: Supplementary file 1 [file 77a38de6c7fd8706bbe70234.pdf]

Somatório de tudo: 254

Total 213 após exclusão de duplicados – 53 cada um

Table 1. Search strategy.

|                                                                                                                                                                                                                                                                                                                                                                                                                                                                                                                                                                                                                                                                                                                          |
|--------------------------------------------------------------------------------------------------------------------------------------------------------------------------------------------------------------------------------------------------------------------------------------------------------------------------------------------------------------------------------------------------------------------------------------------------------------------------------------------------------------------------------------------------------------------------------------------------------------------------------------------------------------------------------------------------------------------------|
| <b>Medline (via PubMed) - searched on September 11, 2023: 110 results</b><br>((terminal care[Title/Abstract]) OR (hospice*[Title/Abstract] OR palliative*[Title/Abstract] OR "end of life"[Title/Abstract] OR end of life care[MeSH Terms] OR palliative care[MeSH Terms] OR hospice[MeSH Terms])) AND (((((((((((decreased saliva flow [Title/Abstract]) OR (mouth dryness[Title/Abstract])) OR (hyposalivation[Title/Abstract])) OR (asialia[Title/Abstract])) OR (dry mouth[Title/Abstract])) OR (xerostomia[Title/Abstract])) OR (Xerostomia[MeSH Terms])) OR (hypoptyalism[Title/Abstract])) OR (salivary gland hypofunction[Title/Abstract])) Filters: in the last 10 years, English, Portuguese, Spanish, MEDLINE |
| <b>CINAHL Complete - searched on September 11, 2023: 48 results</b><br>TI ( decreased saliva flow OR mouth dryness OR hyposalivation OR asialia OR dry mouth OR xerostomia OR hypoptyalism OR salivary gland hypofunction ) OR AB ( decreased saliva flow OR mouth dryness OR hyposalivation OR asialia OR dry mouth OR xerostomia OR hypoptyalism OR salivary gland hypofunction ) OR MH xerostomia AND TI ( terminal care OR hospice* OR palliative* OR end of life ) OR AB ( terminal care OR hospice* OR palliative* OR end of life ) OR MH ( palliative care OR hospice care ) Limiters - 20130901-20230931; Exclude MEDLINE records; Language: English, Portuguese, Spanish                                        |
| <b>Cochrane Central Register of Controlled Trials - searched on September 11, 2023: 17 results</b><br>TI ( decreased saliva flow OR mouth dryness OR hyposalivation OR asialia OR dry mouth OR xerostomia OR hypoptyalism OR salivary gland hypofunction ) OR AB ( decreased saliva flow OR mouth dryness OR hyposalivation OR asialia OR dry mouth OR xerostomia OR hypoptyalism OR salivary gland hypofunction ) AND TI ( terminal care OR hospice* OR palliative* OR end of life ) OR AB ( terminal care OR hospice* OR palliative* OR end of life ) Limiters - 20130901-20230931; Language: English, Portuguese, Spanish                                                                                             |
| <b>Cochrane Database of Systematic Reviews - searched on September 11, 2023: 1 result</b><br>TI ( decreased saliva flow OR mouth dryness OR hyposalivation OR asialia OR dry mouth OR xerostomia OR hypoptyalism OR salivary gland hypofunction ) OR AB ( decreased saliva flow OR mouth dryness OR hyposalivation OR asialia OR dry mouth OR xerostomia OR hypoptyalism OR salivary gland hypofunction ) AND TI ( terminal care OR hospice* OR palliative* OR end of life ) OR AB ( terminal care OR hospice* OR palliative* OR end of life ) Limiters - 20130901-20230931; Language: English, Portuguese, Spanish                                                                                                      |
| <b>Scopus - searched on September 11, 2023: 35 results</b><br>( ( TITLE-ABS ( "terminal care" OR hospice* OR palliative* OR "end of life" ) ) AND ( TITLE-ABS ( "decreased saliva flow" OR "mouth dryness" OR hyposalivation OR asialia OR "dry mouth" OR xerostomia OR hypoptyalism OR "salivary gland hypofunction" ) ) AND PUBYEAR > 2012 AND PUBYEAR < 2024 ) AND NOT ( ( ( PMID ( 1* ) OR PMID ( 2* ) OR PMID ( 3* ) OR PMID ( 4* ) OR PMID ( 5* ) OR PMID ( 6* ) OR PMID ( 7* ) OR PMID ( 8* ) OR PMID ( 9* ) ) ) ) AND ( LIMIT-TO ( LANGUAGE , "English" ) OR LIMIT-TO ( LANGUAGE , "Spanish" ) OR LIMIT-TO ( LANGUAGE , "Portuguese" ) )                                                                         |
| <b>Scielo - searched on September 11, 2023: 0 result</b><br>( (ti:("terminal care" OR hospice* OR palliative* OR "end of life")) OR (ab:("terminal care" OR hospice* OR palliative* OR "end of life"))) AND ((ti:("decreased saliva flow" OR "mouth dryness" OR hyposalivation OR asialia OR "dry mouth" OR xerostomia OR hypoptyalism OR "salivary gland hypofunction" )) OR (ab:("decreased saliva flow" OR "mouth dryness" OR hyposalivation OR asialia OR "dry mouth" OR xerostomia OR hypoptyalism OR "salivary gland hypofunction"))) Filters: in the last 10 years                                                                                                                                                |
| <b>LILACS - searched on September 11, 2023: 8 results</b><br>((ti:("terminal care" OR hospice* OR palliative* OR "end of life")) OR (ab:("terminal care" OR hospice* OR palliative* OR "end of life"))) AND ((ti:("decreased saliva flow" OR "mouth dryness" OR hyposalivation OR asialia OR "dry mouth" OR xerostomia OR hypoptyalism OR "salivary gland hypofunction" )) OR (ab:("decreased saliva flow" OR "mouth dryness" OR hyposalivation OR asialia OR "dry mouth" OR xerostomia OR hypoptyalism OR "salivary gland hypofunction" ))) AND ( db:("LILACS") AND la:("en" OR "pt" OR "es")) AND (year_cluster:[2013 TO 2023])                                                                                        |
| <b>DART-Europe - searched on September 11, 2023: 35 results</b>                                                                                                                                                                                                                                                                                                                                                                                                                                                                                                                                                                                                                                                          |

|                                                                                                                                                                                                                                                                                      |
|--------------------------------------------------------------------------------------------------------------------------------------------------------------------------------------------------------------------------------------------------------------------------------------|
| ("decreased saliva flow" OR "mouth dryness" OR hyposalivation OR asialia OR "dry mouth" OR xerostomia OR hypoptyalism OR "salivary gland hypofunction" ) AND ("terminal care" OR hospice OR palliative OR "end of life") Filters: English; Portuguese; Spanish; in the last 10 years |
| <b>Open Grey- searched on September 11, 2023: 0 results</b>                                                                                                                                                                                                                          |
| ("terminal care" OR hospice* OR palliative* OR "end of life") AND ("decreased saliva flow" OR "mouth dryness" OR hyposalivation OR asialia OR "dry mouth" OR xerostomia OR hypoptyalism OR "salivary gland hypofunction" )                                                           |

Para facilitar a análise coloco aqui a tabela com as questões e critérios de inclusão:

| Scoping review details                                                                               |                                                                                                                                                                                                                                                                                                                                                                                                                                                                                                                                                                                                                     |
|------------------------------------------------------------------------------------------------------|---------------------------------------------------------------------------------------------------------------------------------------------------------------------------------------------------------------------------------------------------------------------------------------------------------------------------------------------------------------------------------------------------------------------------------------------------------------------------------------------------------------------------------------------------------------------------------------------------------------------|
| Scoping review title                                                                                 | Xerostomia care in palliative patients: a scoping review protocol                                                                                                                                                                                                                                                                                                                                                                                                                                                                                                                                                   |
| Review objective(s)                                                                                  | To describe how patients receiving palliative care are treated for xerostomia                                                                                                                                                                                                                                                                                                                                                                                                                                                                                                                                       |
| Review question(s)                                                                                   | <ol style="list-style-type: none"> <li>1. Which health care professional performs the diagnosis of xerostomia on a palliative patients?</li> <li>2. What interventions are implemented for xerostomia in palliative patient?</li> <li>3. What are the characteristics (duration, responsible for implementation, follow-up/evaluation, material/product used) of these interventions?</li> <li>4. In what context (e.g.,home care, palliative care unit, hospice) are these interventions implemented?</li> <li>5. Which types of patients (oncology, non-oncology) are these interventions implemented?</li> </ol> |
| Inclusion/exclusion criteria                                                                         |                                                                                                                                                                                                                                                                                                                                                                                                                                                                                                                                                                                                                     |
| Population                                                                                           | Palliative patients 18 years or over                                                                                                                                                                                                                                                                                                                                                                                                                                                                                                                                                                                |
| Concept                                                                                              | The care health care professionals provide for xerostomia                                                                                                                                                                                                                                                                                                                                                                                                                                                                                                                                                           |
| Context                                                                                              | All contexts of care                                                                                                                                                                                                                                                                                                                                                                                                                                                                                                                                                                                                |
| Types of evidence source                                                                             | Any qualitative, mixed-methods, or quantitative study designs. Additionally, all varieties of systematic reviews.                                                                                                                                                                                                                                                                                                                                                                                                                                                                                                   |
| Evidence source details and characteristics                                                          |                                                                                                                                                                                                                                                                                                                                                                                                                                                                                                                                                                                                                     |
| Author(s)                                                                                            |                                                                                                                                                                                                                                                                                                                                                                                                                                                                                                                                                                                                                     |
| Year of publication                                                                                  |                                                                                                                                                                                                                                                                                                                                                                                                                                                                                                                                                                                                                     |
| Origin/country of origin (where the source was published or conducted)                               |                                                                                                                                                                                                                                                                                                                                                                                                                                                                                                                                                                                                                     |
| Aims/purpose                                                                                         |                                                                                                                                                                                                                                                                                                                                                                                                                                                                                                                                                                                                                     |
| Population and sample size                                                                           |                                                                                                                                                                                                                                                                                                                                                                                                                                                                                                                                                                                                                     |
| Details/Results extracted from the source of evidence (concerning the concept of the scoping review) |                                                                                                                                                                                                                                                                                                                                                                                                                                                                                                                                                                                                                     |
| Who performs the diagnosis                                                                           |                                                                                                                                                                                                                                                                                                                                                                                                                                                                                                                                                                                                                     |
| Interventions implemented                                                                            |                                                                                                                                                                                                                                                                                                                                                                                                                                                                                                                                                                                                                     |
| Characteristics of interventions                                                                     |                                                                                                                                                                                                                                                                                                                                                                                                                                                                                                                                                                                                                     |
| Context of implementation                                                                            |                                                                                                                                                                                                                                                                                                                                                                                                                                                                                                                                                                                                                     |
| Type of disease                                                                                      |                                                                                                                                                                                                                                                                                                                                                                                                                                                                                                                                                                                                                     |
